# Supplementary material for: Anxious Brains: A Combined Data Fusion Machine Learning Approach to Predict Trait Anxiety from Morphometric Features
Source: MDPI journal article supplement (doi:10.3390/s23020610), 2023-01-05
Supplement: s1 [file s1]

**Supplementary Table S1.** Brain areas for Network 3 (IC-GM 4/IC-WM 1), according to the Talairach daemon

| Independent Component IC-GM 4 Positive Values |                    |             |                                |
|-----------------------------------------------|--------------------|-------------|--------------------------------|
| Area                                          | Brodmann Area      | Volume (cc) | MNI (x, y, z)                  |
| Fusiform Gyrus                                | 18, 19, 20, 36, 37 | 5.0/4.5     | (-54, -33, -28)/(55, -31, -28) |
| Inferior Temporal Gyrus                       | 20, 21, 37         | 4.0/4.6     | (-45, -19, -34)/(48, -21, -34) |
| Parahippocampal Gyrus                         | 20, 35, 36         | 1.3/1.6     | (-39, -25, -25)/(42, -30, -28) |
| Sub-Gyral                                     | 20                 | 1.7/2.4     | (-45, -27, -25)/(42, -27, -25) |
| Uncus                                         | 20, 28             | 0.4/1.2     | (-39, -13, -34)/(39, -13, -33) |
| Culmen                                        | *                  | 1.0/0.9     | (-43, -37, -31)/(37, -31, -30) |
| Middle Temporal Gyrus                         | 20, 21, 37         | 0.8/3.7     | (-55, -40, -19)/(58, -39, -19) |
| Declive                                       | *                  | 2.4/0.3     | (-12, -84, -27)/(31, -84, 30)  |
| Inferior Occipital Gyrus                      | 17, 18             | 2.0/0.1     | (-28, -87, -16)/(24, -88, -21) |
| Lingual Gyrus                                 | 17, 18             | 2.1/0.4     | (-13, -90, -21)/(10, -87, -19) |
| Middle Occipital Gyrus                        | 18                 | 1.5/0.0     | (-28, -84, -13)/(0, 0, 0)      |
| Insula                                        | 13                 | 1.1/0.0     | (-37, -28, 18)/(0, 0, 0)       |
| Independent Component IC-WM 1 Positive Values |                    |             |                                |
| Area                                          | Brodmann Area      | Volume (cc) | MNI (x, y, z)                  |
| Middle Frontal Gyrus                          | 6, 8, 9            | 3.3/2.0     | (-30, 18, 46)/(37, 13, 43)     |
| Precentral Gyrus                              | 6, 9, 44           | 0.4/1.1     | (-33, 21, 40)/(34, 13, 40)     |
| Inferior Occipital Gyrus                      | 17, 18, 19         | 0.0/1.4     | (0, 0, 0)/(28, -85, -10)       |
| Sub-Gyral                                     | *                  | 2.8/3.9     | (-24, 27, 37)/(28, -85, -6)    |
| Lingual Gyrus                                 | 17, 18             | 0.0/2.9     | (0, 0, 0)/(25, -88, -10)       |
| Middle Occipital Gyrus                        | 18, 19             | 0.0/4.6     | (0, 0, 0)/(25, -85, 13)        |
| Inferior Parietal Lobule                      | 40                 | 0.0/4.8     | (0, 0, 0)/(51, -36, 31)        |
| Cuneus                                        | 17, 18             | 0.0/3.1     | (0, 0, 0)/(24, -84, 9)         |
| Fusiform Gyrus                                | 20, 36             | 1.1/1.2     | (-39, -27, -30)/(49, -36, -27) |
| Independent Component IC-WM 1 Negative Values |                    |             |                                |
| Area                                          | Brodmann Area      | Volume (cc) | MNI (x, y, z)                  |
| Sub-Gyral                                     | *                  | 11.5/13.9   | (-39, -52, 10)/(31, -55, 37)   |
| Inferior Parietal Lobule                      | 7, 40              | 0.0/1.2     | (0, 0, 0)/(31, -55, 43)        |
| Superior Temporal Gyrus                       | 21, 22, 39         | 3.5/2.1     | (-42, -55, 10)/(37, -60, 28)   |
| Cuneus                                        | 7, 18, 19          | 0.0/1.9     | (0, 0, 0)/(21, -76, 28)        |
| Middle Temporal Gyrus                         | 19, 21, 22, 39     | 6.4/0.6     | (-45, -58, 10)/(34, -63, 28)   |
| Precuneus                                     | 7, 19, 31          | 0.0/4.9     | (0, 0, 0)/(25, -58, 40)        |
| Middle Frontal Gyrus                          | 6, 9               | 0.3/1.4     | (-37, -1, 45)/(37, 21, 31)     |
| Extra-Nuclear                                 | 13                 | 2.9/3.5     | (-31, 9, -4)/(33, 7, -9)       |
| Inferior Frontal Gyrus                        | 13, 47             | 1.3/0.3     | (-37, 33, 6)/(36, 34, 3)       |
| Insula                                        | 13, 22             | 0.4/1.0     | (-31, 15, -4)/(31, 13, -3)     |
| Tuber                                         | *                  | 0.4/1.0     | (-37, -58, -36)/(37, -58, -36) |
| Pyramis                                       | *                  | 0.7/1.2     | (-15, -67, -37)/(18, -66, -36) |
| Culmen                                        | *                  | 0.2/1.0     | (-37, -55, -39)/(34, -61, -34) |
